# Supplementary material
Source: PubMed Central journal article supplement (PMC4113474)
Supplement: NIHMS597594-supplement-1.pdf [file NIHMS597594-supplement-1.pdf]

Supplemental Material

**Analytical Validation of the RT-PCR Assay:** Assay performance was tested for intra-assay coefficient of variation (CV) using 6 replicates in 3 independent experiments, and inter-assay CV across 6-log dilutions, each in triplicate, by 3 different technologists. A CV below 15% is considered an acceptable level. The dynamic linearity of the assay was tested over a log range of dilutions from 0.1 pg to 1,000 ng RNA of human prostate LNCaP cell line. The linear correlation coefficient was calculated, and the concordance between a standard PCR platform (Eppendorf Realplex) and the multiplex PCR assay was tested with 5 serial dilutions.

Each assay was tested in single runs and as a multiplex run to exclude interference in reverse transcription and inter-primer interference. The analytical sensitivity of each assay was evaluated using LNCaP prostate cancer cells spiked at 10, 100, 500, and 1,000 cells per 2.5 ml of volunteer blood.

The RT-PCR analysis of each gene transcript detection from 10 LNCaP cells spiked in 2.5ml of healthy volunteer blood demonstrated CV<6% .

**Figure S1. Analytical validation of the RT-PCR assay.** The dynamic linearity range and the limit of detection were established based on LNCaP dilutions from 1 pg to 100 ng.

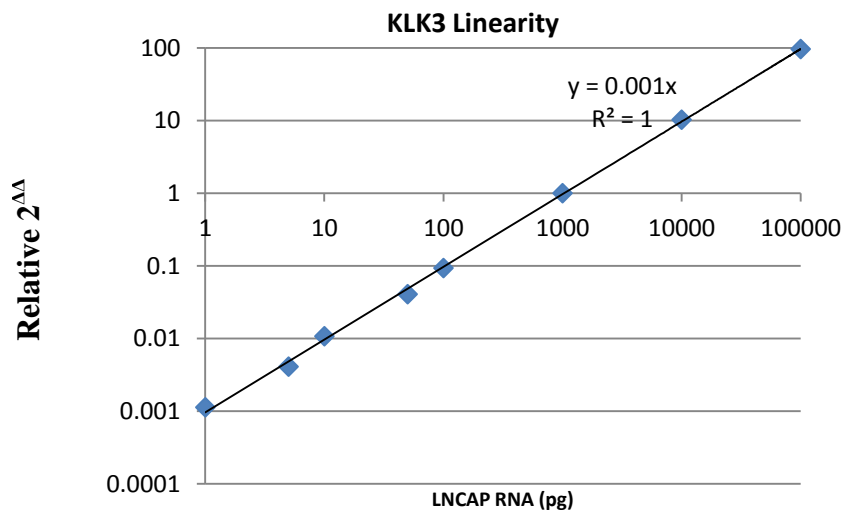

**Table S1. Performance of the multiplex detection of *KLK3*, *KLK2*, *HOXB13*, *GRHL2*, and *FOXA1***

**transcripts:** Assay performance was tested for intra- and inter-assay coefficient of variation (CV) and dynamic linear correlation and a reportable range was established for the multiplex detection using LNCaP RNA. Percentage of volunteer controls and CRCP patients with detectable transcripts, per gene.

\*, n=6

|                      | Assay CV      |               | Linear Correlation | Reportable Range | p-value | C <sub>t</sub> Threshold | Detectable signal (%) |                 |
|----------------------|---------------|---------------|--------------------|------------------|---------|--------------------------|-----------------------|-----------------|
|                      | Intra- (n=18) | Inter- (n=42) |                    |                  |         |                          | Controls (n=51)       | Patients (n=97) |
| <b><i>KLK3</i></b>   | 1.05%         | 2.13%         | 1                  | 1 pg - 100 ng    | < 0.001 | 26.9                     | 0%                    | 55%             |
| <b><i>KLK2</i></b>   | 0.27%*        | 2.98%         | 0.999              | 5 pg - 100 ng    | < 0.001 | 40                       | 0%                    | 39%             |
| <b><i>HOXB13</i></b> | 1.02%         | 1.29%         | 1                  | 5 pg - 100 ng    | < 0.001 | 34.4                     | 6%                    | 53%             |
| <b><i>GRHL2</i></b>  | 0.98%         | 1.08%         | 1                  | 10 pg - 100 ng   | < 0.001 | 40                       | 0%                    | 29%             |
| <b><i>FOXA1</i></b>  | 0.88%         | 1.26%         | 0.999              | 50 pg - 100 ng   | < 0.001 | 40                       | 0%                    | 42%             |

**Table S2. Distribution of the original 130 genes.** Filtering steps.

**S2.A** Gene expression enriched  $\geq 4$ -fold in prostate tissue compared to PBMC in TiGER (Tissue-specific Gene Expression and Regulation) database(12) resulted in 130 genes.

| Symbol | Enrichment factor (TiGER) |
|--------|---------------------------|
| UPK3A  | 25.5235                   |
| SEMG1  | 24.1104                   |
| PRAC   | 23.9283                   |
| SEMG2  | 23.6152                   |

## Danila – Validating a whole blood mRNA-based prostate cancer biomarker

|               |                |
|---------------|----------------|
| MSMB          | 23.2264        |
| EDC3          | 23.2264        |
| <b>KLK2</b>   | <b>22.7748</b> |
| TGM4          | 21.6653        |
| KLK4          | 20.2061        |
| OR51E2        | 20.1094        |
| ACPP          | 19.693         |
| TARP          | 18.4554        |
| <b>KLK3</b>   | <b>18.3136</b> |
| NKX3-1        | 18.0329        |
| PPIL5         | 17.8664        |
| <b>HOXB13</b> | <b>16.8346</b> |
| POTEG         | 16.0703        |
| RLN1          | 15.3141        |
| PCDHB8        | 14.5848        |
| PCDHB13       | 14.5848        |
| SLC45A3       | 14.4948        |
| XCL2          | 13.9219        |
| <b>FOXA1</b>  | <b>13.629</b>  |
| TRPM8         | 13.6125        |
| TMPRSS2       | 12.8894        |
| SRD5A2        | 12.7617        |
| PATE1         | 12.7617        |
| GLTSCR1       | 12.6767        |
| LOC150519     | 12.6488        |
| ATP5SL        | 12.4288        |
| AR            | 12.2513        |
| C5orf37       | 12.1727        |
| NWD1          | 12.0111        |
| ANO7          | 11.9641        |
| SLC39A2       | 11.7801        |
| TEPP          | 11.6016        |
| DOCK9         | 11.2079        |
| MPHOSPH10     | 10.9386        |
| CYP24A1       | 10.9386        |
| TDRD6         | 10.7984        |
| ARHGAP6       | 10.7846        |
| FCER1A        | 10.7467        |
| ZNF554        | 10.6348        |
| SPRR4         | 10.5097        |
| FLJ20184      | 10.4414        |
| C21orf84      | 10.2094        |
| CPNE4         | 10.176         |
| ALOX15B       | 10.0092        |
| ZNF35         | 9.96039        |
| KCNJ5         | 9.9258         |
| C6orf141      | 9.81673        |
| PLA2G4F       | 9.40339        |
| ACTG2         | 9.37597        |
| SULT2B1       | 9.32589        |
| LMAN1L        | 9.21681        |

## Danila – Validating a whole blood mRNA-based prostate cancer biomarker

|           |         |
|-----------|---------|
| C10orf125 | 9.00829 |
| CSTA      | 8.84814 |
| SATB1     | 8.70801 |
| BMPR1B    | 8.36114 |
| PAGE4     | 8.24605 |
| AMACR     | 8.18935 |
| PTGFR     | 8.12111 |
| EPC1      | 8.02543 |
| NEFH      | 8.01319 |
| LPAR3     | 7.97609 |
| KCNC2     | 7.81331 |
| OR51E1    | 7.76802 |
| TTC8      | 7.7482  |
| SCGB3A1   | 7.65705 |
| CYP4F8    | 7.65705 |
| LOC643837 | 7.63523 |
| ZNF552    | 7.53152 |
| DNAJC19   | 7.52943 |
| PIP       | 7.50691 |
| NPY       | 7.38838 |
| WNT5B     | 7.37345 |
| CD177     | 7.29242 |
| RPL22L1   | 7.25897 |
| TMEM220   | 7.14658 |
| MYH11     | 7.13156 |
| SLC2A12   | 7.04096 |
| TMEFF2    | 7.01195 |
| TTL3      | 7.00997 |
| FOLH1     | 6.99838 |
| DNAH5     | 6.96095 |
| DNAH8     | 6.96095 |
| SCUBE2    | 6.93231 |
| RDH11     | 6.92832 |
| SLC14A1   | 6.83023 |
| ERGIC1    | 6.78767 |
| ZNF761    | 6.6583  |
| PSCA      | 6.63611 |
| TSC22D2   | 6.55028 |
| IGF1      | 6.52926 |
| EMILIN2   | 6.52926 |
| EPHX2     | 6.51663 |
| PAEP      | 6.49689 |
| NME4      | 6.4031  |
| S1PR5     | 6.38087 |
| OPLAH     | 6.38087 |
| ITGA8     | 6.25065 |
| ZNF613    | 6.16084 |
| PART1     | 6.04504 |
| TNFRSF10D | 5.9251  |
| PDE9A     | 5.91849 |
| SLC30A4   | 5.74278 |

**Danila – Validating a whole blood mRNA-based prostate cancer biomarker**

|              |                |
|--------------|----------------|
| C1orf116     | 5.73784        |
| HOXA13       | 5.67189        |
| ABCC4        | 5.60563        |
| HIST1H4H     | 5.60272        |
| DLK2         | 5.58326        |
| TRAPPC6B     | 5.5257         |
| STEAP1       | 5.51859        |
| AQP2         | 5.51859        |
| PCP4         | 5.46932        |
| MST1R        | 5.43943        |
| <b>GRHL2</b> | <b>5.38569</b> |
| ZG16B        | 5.37337        |
| FAM83A       | 5.34213        |
| MARVELD2     | 5.23559        |
| CTSG         | 5.22071        |
| AZGP1        | 5.19122        |
| PTGS2        | 5.18446        |
| LCAT         | 5.16931        |
| RPL39        | 5.1047         |
| HOXD9        | 5.1047         |
| PSEN2        | 5.1047         |
| ING2         | 5.1047         |
| SLC26A7      | 5.1047         |
| SCGB1A1      | 5.02101        |

Danila – Validating a whole blood mRNA-based prostate cancer biomarker

**S2.B** Top 30 genes expressed in prostate cancer metastatic tissue (Prostate Cancer Genomic Project(13)).

| Symbol        | Enrichment factor (TiGER) | Mets (average) |
|---------------|---------------------------|----------------|
| OR51E2        | 20.1094                   | 12.98          |
| <b>KLK2</b>   | <b>22.7748</b>            | <b>12.08</b>   |
| <b>KLK3</b>   | <b>18.3136</b>            | <b>12.06</b>   |
| LOC643837     | 7.63523                   | 11.71          |
| IGF1          | 6.52926                   | 11.3           |
| SLC30A4       | 5.74278                   | 11.06          |
| SLC45A3       | 14.4948                   | 10.96          |
| TMEM220       | 7.14658                   | 10.77          |
| AMACR         | 8.18935                   | 10.74          |
| MARVELD2      | 5.23559                   | 10.71          |
| ERGIC1        | 6.78767                   | 10.63          |
| NKX3-1        | 18.0329                   | 10.51          |
| <b>FOXA1</b>  | <b>13.629</b>             | <b>10.41</b>   |
| AR            | 12.2513                   | 10.38          |
| FOLH1         | 6.99838                   | 10.34          |
| RPL39         | 5.1047                    | 10.29          |
| ZNF552        | 7.53152                   | 10.17          |
| RDH11         | 6.92832                   | 10             |
| ACPP          | 19.693                    | 9.98           |
| <b>HOXB13</b> | <b>16.8346</b>            | <b>9.94</b>    |
| NME4          | 6.4031                    | 9.94           |
| ABCC4         | 5.60563                   | 9.81           |
| ZNF554        | 10.6348                   | 9.69           |
| KLK4          | 20.2061                   | 9.65           |
| NPY           | 7.38838                   | 9.65           |
| HIST1H4H      | 5.60272                   | 9.6            |
| KCNJ5         | 9.9258                    | 9.55           |
| ZG16B         | 5.37337                   | 9.52           |
| <b>GRHL2</b>  | <b>5.38569</b>            | <b>9.51</b>    |
| TARP          | 18.4554                   | 9.46           |

**Danila – Validating a whole blood mRNA-based prostate cancer biomarker**

**S2.C** Top 10 genes expressed in prostate tissue but not in PBMC or in >2 tissues other than prostate tissue. (Novartis Gene Expression Database(14)).

| <b>Symbol</b> | <b>Enrichment factor<br/>(TiGER)</b> | <b>Mets<br/>(average)</b> | <b>GNF tissues</b>    | <b>RT-qPCR<br/>signal in<br/>PBMC</b> | <b>Final<br/>selection</b> |
|---------------|--------------------------------------|---------------------------|-----------------------|---------------------------------------|----------------------------|
| <b>KLK2</b>   | 22.7748                              | 12.08                     | prostate only         | NO                                    | YES                        |
| <b>KLK3</b>   | 18.3136                              | 12.06                     | prostate only         | NO                                    | YES                        |
| SLC45A3       | 14.4948                              | 10.96                     | prostate only         | YES                                   | NO                         |
| NKX3-1        | 18.0329                              | 10.51                     | prostate, trachea     | YES                                   | NO                         |
| <b>FOXA1</b>  | 13.629                               | 10.41                     | prostate, lung, liver | NO                                    | YES                        |
| FOLH1         | 6.99838                              | 10.34                     | prostate only         | YES                                   | NO                         |
| ACPP          | 19.693                               | 9.98                      | prostate only         | YES                                   | NO                         |
| <b>HOXB13</b> | 16.8346                              | 9.94                      | prostate only         | NO                                    | YES                        |
| NPY           | 7.38838                              | 9.65                      | prostate only         | YES                                   | NO                         |
| <b>GRHL2</b>  | 5.38569                              | 9.51                      | prostate, placenta    | NO                                    | YES                        |
